# Supplementary material for: Prolactin in Pregnancies Affected by Pre-Existing Maternal Metabolic Conditions: A Systematic Review
Source: MDPI journal article supplement (doi:10.3390/ijms24032840), 2023-02-02
Supplement: s1 [file s1]

## Supplementary material S1: Search strategy

Ovid MEDLINE(R) and Epub Ahead of Print, In-Process, In-Data-Review & Other Non-Indexed Citations, Daily and Versions(R) <1946 to current>

- 1 (pregnan\* or gestation\* or post?partum or post-partum or lactat\* or breastfe\*).ti,ab.
- 2 exp pregnancy/
- 3 postpartum period/
- 4 lactation/
- 5 Breast Feeding/
- 6 1 or 2 or 3 or 4 or 5
- 7 prolactin.ti,ab.
- 8 prolactin/
- 9 placenta\* lactogen\*.ti,ab.
- 10 placental lactogen/
- 11 somato-mammotropin.ti,ab.
- 12 somato?mammotropin.ti,ab.
- 13 7 or 8 or 9 or 10 or 11 or 12
- 14 ((pregnan\* or gestation\* or matern\* or post?partum or post-partum or birth or f?etal or baby or infant\* or newborn\* or neonat\*) adj1 weight\*).ti,ab.
- 15 (placenta\* adj1 weight\*).ti,ab.
- 16 (placenta\* adj1 mass\*).ti,ab.
- 17 (diabet\* or glucose or obes\* or metabolic).ti,ab.
- 18 polycystic ovar\*.ti,ab.
- 19 exp diabetes mellitus/
- 20 glucose intolerance/
- 21 exp diabetes, gestational/
- 22 obesity, maternal/
- 23 birth weight/
- 24 fetal weight/
- 25 polycystic ovary syndrome/
- 26 pregnancy outcome/
- 27 14 or 15 or 16 or 17 or 18 or 19 or 20 or 21 or 22 or 23 or 24 or 25 or 26
- 28 6 and 13 and 27
- 29 exp animals/ not humans.sh.
- 30 28 not 29

Embase Classic+Embase <1947 to current>

- 1 (pregnan\* or gestation\* or post?partum or post-partum or lactat\* or breastfe\*).ti,ab.
- 2 exp pregnancy/
- 3 lactation/
- 4 breast feeding/
- 5 1 or 2 or 3 or 4
- 6 prolactin.ti,ab.
- 7 prolactin/
- 8 placenta\* lactogen\*.ti,ab.
- 9 placenta lactogen/
- 10 somato-mammotropin.ti,ab.
- 11 somato?mammotropin.ti,ab.
- 12 6 or 7 or 8 or 9 or 10 or 11
- 13 ((pregnan\* or gestation\* or matern\* or post?partum or post-partum or birth or f?etal or baby or infant\* or newborn\* or neonat\*) adj1 weight\*).ti,ab.
- 14 (placenta\* adj1 weight\*).ti,ab.
- 15 (placenta\* adj1 mass\*).ti,ab.
- 16 (diabet\* or glucose or obes\* or metabolic).ti,ab.
- 17 polycystic ovar\*.ti,ab.
- 18 exp diabetes mellitus/
- 19 glucose intolerance/
- 20 pregnancy diabetes mellitus/
- 21 maternal obesity/
- 22 birth weight/
- 23 fetus weight/
- 24 ovary polycystic disease/
- 25 pregnancy outcome/
- 26 13 or 14 or 15 or 16 or 17 or 18 or 19 or 20 or 21 or 22 or 23 or 24 or 25
- 27 5 and 12 and 26
- 28 (exp animal/ or exp invertebrate/ or nonhuman/ or animal experiment/ or animal tissue/ or animal model/ or exp plant/ or exp fungus/) not (exp human/ or human tissue/)
- 29 27 not 28

CINAHL PLUS

- S26 S6 AND S12 AND S25
- S25 S13 OR S14 OR S15 OR S16 OR S17 OR S18 OR S19 OR S20 OR S21 OR S22 OR S23 OR S24
- S24 (MH "Pregnancy Outcomes")
- S23 (MH "Polycystic Ovary Syndrome")
- S22 (MH "Fetal Weight")
- S21 (MH "Birth Weight")
- S20 (MH "Obesity, Maternal")
- S19 (MH "Diabetes Mellitus, Gestational")
- S18 (MH "Glucose Intolerance")
- S17 (MH "Diabetes Mellitus+")
- S16 polycystic ovar\*
- S15 diabet\* or glucose or obes\* or metabolic
- S14 placenta\* N1 (weight\* OR mass\*)
- S13 (pregnan\* or gestation\* or matern\* or post?partum or postpartum or birth or f?etal or baby or infant\* or newborn\* or neonat\*) N1 weight\*
- S12 S7 OR S8 OR S9 OR S10 OR S11
- S11 somatomammotropin
- S10 (MH "Placental Hormones")
- S9 "placenta\* lactogen"
- S8 (MH "Prolactin")
- S7 prolactin
- S6 S1 OR S2 OR S3 OR S4 OR S5
- S5 (MH "Breast Feeding")
- S4 (MH "Lactation")
- S3 (MH "Postnatal Period+")
- S2 (MH "Pregnancy+")
- S1 pregnan\* or gestation\* or post?partum or postpartum or lactat\* or breastfe\*
